# Supplementary material
Source: Preprints.org preprint supplement (doi:10.20944/preprints201903.0196.v1)
Supplement: Supplementary file 1 [file supplementary]

## Sheet: Sheet1
Supplementary Table 1. Contents of amino acids detected in fresh tree peony flowers
Accession	Gly	Arg	Cys	Glu	His	Ile	Leu	Lys	Phe	Ser	Thr	Tyr	Val	Ala	Met	Asp	Pro	Trp
Shanhutai	8.439 ± 0.418	6.538 ± 0.372	1.066 ± 0.055	7.999 ± 0.656	3.834 ± 0.116	5.618 ± 0.205	10.546 ± 0.253	4.941 ± 0.422	4.452 ± 0.26	6.735 ± 0.046	4.913 ± 0.093	3.55 ± 0.056	8.278 ± 0.094	9.933 ± 0.042	2.013 ± 0.075	14.28 ± 0.132	10.16 ± 0.053	0.895 ± 0.301
Jinpaohong	2.685 ± 0.25	3.74 ± 0.109	0.7 ± 0.039	17.339 ± 0.508	2.717 ± 0.024	3.364 ± 0.133	7.053 ± 0.339	3.879 ± 0.319	3.658 ± 0.071	9.272 ± 0.169	4.309 ± 0.053	2.266 ± 0.039	3.483 ± 0.049	2.545 ± 0.092	0.46 ± 0.043	11.83 ± 0.247	4.818 ± 0.074	0.747 ± 0.491
Xueyingtaohua	6.394 ± 0.246	10.785 ± 0.654	1.318 ± 0.018	14.776 ± 1.114	3.851 ± 0.053	6.254 ± 0.461	9.67 ± 0.088	8.361 ± 0.427	3.359 ± 0.195	6.958 ± 0.097	5.576 ± 0.124	3.136 ± 0.113	5.849 ± 0.092	9.707 ± 0.145	1.626 ± 0.099	12.237 ± 0.348	10.635 ± 0.284	1.045 ± 0.164
Zhihong	1.347 ± 0.05	2.402 ± 0.317	0.211 ± 0.016	9.381 ± 0.673	0.962 ± 0.019	2.933 ± 0.033	3.415 ± 0.128	2.027 ± 0.158	3.338 ± 0.054	3.985 ± 0.129	1.131 ± 0.009	2.501 ± 0.126	1.607 ± 0.033	1.091 ± 0.015	0.325 ± 0.054	8.117 ± 0.035	2.48 ± 0.034	0.777 ± 0.229
Juanyehong	2.247 ± 0.171	7.089 ± 0.315	0.66 ± 0.046	7.8 ± 0.486	2.228 ± 0.047	4.66 ± 0.072	7.837 ± 0.365	2.033 ± 0.078	2.664 ± 0.175	3.602 ± 0.078	3.243 ± 0.022	4.499 ± 0.054	3.485 ± 0.064	5.443 ± 0.095	1.08 ± 0.047	8.055 ± 0.066	10.098 ± 0.262	0.964 ± 0.234
Weizi	2.095 ± 0.267	4.365 ± 0.376	0.616 ± 0.033	15.153 ± 0.179	2.681 ± 0.057	7.012 ± 0.018	7.396 ± 0.364	3.205 ± 0.328	6.848 ± 0.495	6.411 ± 0.13	3.228 ± 0.071	3.128 ± 0.102	3.716 ± 0.1	1.339 ± 0.049	0.979 ± 0.049	5.697 ± 0.013	8.446 ± 0.314	0.91 ± 0.21
Lanzikui	2.116 ± 0.196	8.839 ± 0.636	0.827 ± 0.019	18.724 ± 0.264	2.491 ± 0.043	3.77 ± 0.213	6.646 ± 0.403	2.635 ± 0.076	5.451 ± 0.159	5.835 ± 0.028	2.719 ± 0.06	4.121 ± 0.133	2.981 ± 0.066	3.805 ± 0.117	0.669 ± 0.032	8.623 ± 0.072	3.708 ± 0.117	1.067 ± 0.118
Hongxia	1.306 ± 0.024	4.067 ± 0.412	0.423 ± 0.023	10.012 ± 0.681	1.449 ± 0.047	2.128 ± 0.086	3.56 ± 0.425	2.601 ± 0.07	1.747 ± 0.097	2.828 ± 0.037	2.035 ± 0.058	0.738 ± 0.036	1.676 ± 0.013	1.021 ± 0.034	0.539 ± 0.07	4.534 ± 0.044	3.304 ± 0.012	0.894 ± 0.215
Shouanhong	1.325 ± 0.034	4.782 ± 0.235	0.22 ± 0.026	12.256 ± 0.762	1.024 ± 0.026	2.175 ± 0.064	3.133 ± 0.037	2.571 ± 0.099	1.803 ± 0.038	1.496 ± 0.023	1.322 ± 0.012	2.617 ± 0.059	0.743 ± 0.016	1.345 ± 0.019	0.294 ± 0.036	4.5 ± 0.052	1.173 ± 0.022	0.743 ± 0.19
Wulongpengsheng	2.213 ± 0.294	2.428 ± 0.288	0.262 ± 0.018	9.494 ± 0.153	1.909 ± 0.051	3.038 ± 0.041	4.496 ± 0.076	2.281 ± 0.124	1.706 ± 0.079	6.46 ± 0.112	2.714 ± 0.022	0.958 ± 0.046	2.292 ± 0.04	1.876 ± 0.035	0.658 ± 0.063	4.968 ± 0.055	4.272 ± 0.047	1.122 ± 0.065
Yaohuang	10.82 ± 0.16	5.743 ± 0.342	0.544 ± 0.032	16.714 ± 0.44	2.39 ± 0.049	4.609 ± 0.116	6.312 ± 0.404	4.326 ± 0.176	1.84 ± 0.027	10.576 ± 0.133	3.051 ± 0.079	1.777 ± 0.033	3.658 ± 0.084	4.529 ± 0.151	0.736 ± 0.048	5.695 ± 0.114	6.76 ± 0.104	0.787 ± 0.352
Nihonghuancai	3.666 ± 0.337	9.02 ± 0.293	0.847 ± 0.008	19.793 ± 0.335	3.369 ± 0.021	7.645 ± 0.042	7.189 ± 0.515	8.801 ± 0.402	9.358 ± 0.342	9.042 ± 0.092	4.681 ± 0.071	7.731 ± 0.174	4.898 ± 0.128	3.898 ± 0.041	0.847 ± 0.049	10.213 ± 0.181	5.061 ± 0.067	0.86 ± 0.253
Xiangyu	4.795 ± 0.422	2.736 ± 0.677	0.274 ± 0.022	11.328 ± 0.528	2.141 ± 0.028	6.141 ± 0.099	6.692 ± 0.54	4.06 ± 0.264	2.04 ± 0.053	7.635 ± 0.011	2.395 ± 0.055	5.221 ± 0.06	2.711 ± 0.047	2.896 ± 0.034	0.332 ± 0.055	4.253 ± 0.045	4.593 ± 0.017	1 ± 0.024
Hongbaoshi	1.542 ± 0.074	1.511 ± 0.097	0.223 ± 0.01	16.21 ± 0.598	1.224 ± 0.008	2.629 ± 0.034	3.779 ± 0.212	1.208 ± 0.044	3.271 ± 0.041	6.429 ± 0.222	2.236 ± 0.062	1.504 ± 0.05	1.882 ± 0.039	1.594 ± 0.055	0.332 ± 0.016	5.967 ± 0.116	3.93 ± 0.045	1.04 ± 0.13
Roufurong	1.347 ± 0.085	2.636 ± 0.256	0.673 ± 0.045	17.482 ± 0.601	2.694 ± 0.011	3.48 ± 0.146	6.609 ± 0.423	2.114 ± 0.035	3.563 ± 0.001	8.832 ± 0.04	2.707 ± 0.053	2.082 ± 0.146	2.926 ± 0.045	1.552 ± 0.059	0.608 ± 0.029	11.22 ± 0.1	4.69 ± 0.053	1.062 ± 0.169
Gejinzi	1.594 ± 0.054	3.789 ± 0.218	0.308 ± 0.021	13.968 ± 0.412	2.057 ± 0.082	5.314 ± 0.14	7.943 ± 0.473	2.85 ± 0.358	4.922 ± 0.348	7.982 ± 0.31	3.131 ± 0.148	2.416 ± 0.038	3.429 ± 0.083	1.727 ± 0.06	0.479 ± 0.056	6.726 ± 0.363	7.369 ± 0.107	0.963 ± 0.121
Shibahao	1.309 ± 0.042	2.345 ± 0.101	0.13 ± 0.008	6.977 ± 0.139	1.212 ± 0.002	2.866 ± 0.018	4.006 ± 0.161	1.475 ± 0.066	2.039 ± 0.017	2.892 ± 0.011	1.317 ± 0.036	1.159 ± 0.053	1.583 ± 0.022	0.738 ± 0.048	0.279 ± 0.093	5.565 ± 0.1	4.414 ± 0.116	0.949 ± 0.084
Jingyu	2.359 ± 0.22	8.531 ± 0.188	0.712 ± 0.027	12.017 ± 1.078	3.805 ± 0.123	5.854 ± 0.167	9.683 ± 0.13	2.692 ± 0.142	2.067 ± 0.052	3.761 ± 0.044	3.037 ± 0.046	2.06 ± 0.056	4.688 ± 0.092	8.597 ± 0.205	1.382 ± 0.044	8.506 ± 0.264	5.594 ± 0.195	0.839 ± 0.312
Baixueta	6.107 ± 0.198	8.665 ± 0.352	1.465 ± 0.092	10.976 ± 0.117	3.408 ± 0.135	7.101 ± 0.108	9.432 ± 0.329	6.352 ± 0.576	3.625 ± 0.014	6.652 ± 0.036	4.003 ± 0.094	3.691 ± 0.025	7.076 ± 0.1	8.555 ± 0.228	1.789 ± 0.073	15.663 ± 0.28	6.536 ± 0.125	0.973 ± 0.131
Morunjuelun	12.321 ± 0.222	10.924 ± 0.746	1.48 ± 0.058	10.417 ± 0.69	5.244 ± 0.067	10.353 ± 0.118	12.218 ± 0.547	10.822 ± 0.164	9.476 ± 0.277	9.5 ± 0.173	7.505 ± 0.067	6.151 ± 0.193	10.703 ± 0.21	12.282 ± 0.259	2.781 ± 0.074	17.088 ± 0.576	9.481 ± 0.21	0.727 ± 0.402
Linghuazhanlu	1.269 ± 0.033	6.545 ± 0.636	0.355 ± 0.021	9.536 ± 0.568	0.973 ± 0.03	2.24 ± 0.054	3.539 ± 0.43	2.76 ± 0.333	2.309 ± 0.143	2.48 ± 0.037	0.995 ± 0.028	6.238 ± 0.143	1.571 ± 0.038	0.496 ± 0.028	0.197 ± 0.083	7.019 ± 0.097	2.133 ± 0.023	1.086 ± 0.024
Zangzihong	7.066 ± 3.383	8.416 ± 1.298	1.49 ± 0.609	10.584 ± 1.119	4.93 ± 2.305	6.209 ± 2.275	10.38 ± 4.302	2.103 ± 0.604	3.018 ± 0.379	4.572 ± 1.203	3.98 ± 1.707	3.006 ± 1.912	4.955 ± 1.953	10.855 ± 6.025	1.177 ± 0.506	8.589 ± 0.868	10.177 ± 4.618	0.69 ± 0.218
Dahuhong	1.091 ± 0.021	7.445 ± 0.347	0.618 ± 0.019	19.891 ± 0.549	3.197 ± 0.194	6.973 ± 0.064	5.911 ± 0.065	4.313 ± 0.259	7.824 ± 0.185	5.502 ± 0.029	2.312 ± 0.01	4.379 ± 0.089	2.673 ± 0.004	1.521 ± 0.041	0.531 ± 0.374	8.525 ± 0.24	3.433 ± 0.037	0.987 ± 0.071
